# Supplementary material for: Oxalis tetraphylla (Class: Magnoliopsidae) Possess Flavonoid Phytoconstituents with Nematocidal Activity against Haemonchus contortus
Source: MDPI journal article supplement (doi:10.3390/pathogens11091024), 2022-09-08
Supplement: s1 [file s1]

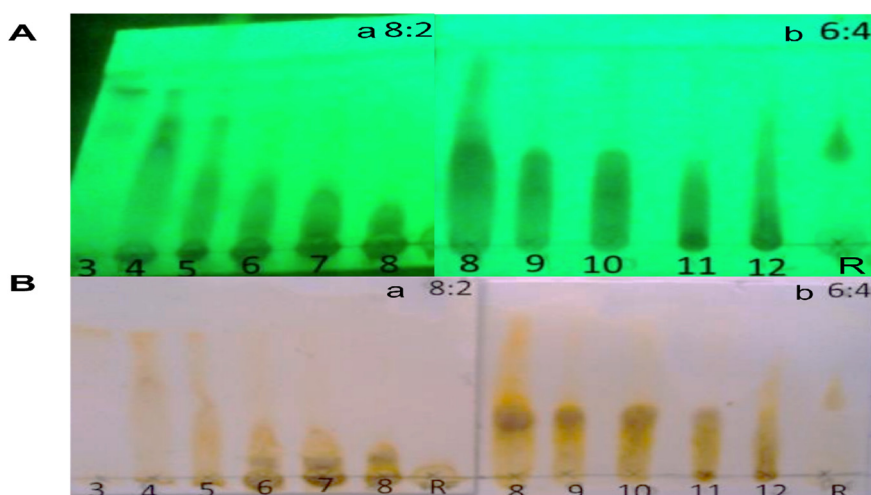

Figure S1. **A)** TLC plate from *Oxalis tetraphylla* aqueous phase (normal phase) visualized with UV light; numbers correspond to eluted fractions collected from two DCM:MeOH systems: a) system 8:2, fractions 3 to 7 and b) system 6:4, fractions 8 to 12. R=Routine (standard). **B)** Same plates, developed with flavonoid reagent showing bands associated with the presence of flavonoids at two DCM:MeOH systems, were visualized: a) system 8:2, fractions 3 to 8 and b) system 6:4, fractions 8 to 12.
